# Supplementary material for: The smallest organocatalyst in highly enantioselective direct aldol reaction in wet solvent-free conditions
Source: Royal Society of Chemistry journal article supplement (doi:10.1039/c4ra02690j), 2014-01-01
Supplement: c4ra02690j1.pdf [file c4ra02690j1.pdf]

## SUPPORTING INFORMATION

### **The smallest organocatalyst in highly enantioselective direct aldol reaction in wet solvent-free conditions**

**Sudipto Bhowmick<sup>†</sup>, Sunita S. Kunte<sup>#</sup> and Kartick C. Bhowmick<sup>†,\*</sup>**

*<sup>†</sup> Division of Organic Synthesis, Department of Chemistry, Visva-Bharati University; Bolpur, West Bengal-731 235, India*

*<sup>#</sup> Division of Organic Chemistry, Analytical Section, National Chemical Laboratory, Pune-411 008, India*

|                                                                  |    |
|------------------------------------------------------------------|----|
| General Methods                                                  | 2  |
| Synthesis of L-proline hydrazide <b>1</b>                        | 3  |
| <sup>1</sup> H NMR spectrum of catalyst <b>1</b>                 | 4  |
| <sup>13</sup> C NMR spectrum of catalyst <b>1</b>                | 5  |
| FT- IR spectrum of Catalyst <b>1</b>                             | 6  |
| ESI-MS Spectrum of Catalyst <b>1</b>                             | 7  |
| General procedure for the enantioselective direct aldol reaction | 8  |
| HPLC data for chiral aldol products                              | 9  |
| References                                                       | 14 |
| HPLC charts                                                      | 15 |
| Table 3                                                          | 30 |

## Experimental Section

**General Methods.** Routine monitoring of reaction was performed by TLC, using pre-coated silica gel TLC plates obtained by E-Merck. All the column chromatographic separations were done by using silica gel (60-120 mesh). Petroleum ether used was of boiling range 60-80 °C. Proton nuclear magnetic resonance (<sup>1</sup>H NMR) spectra were recorded on BRUKER-400 MHz spectrometer. Chemical shifts are expressed in ppm downfield from TMS as internal standard. Infrared (IR) spectra were recorded on a FT-IR spectrometer (Shimadzu). Melting points were measured on a digital melting point apparatus. Analytical high performance liquid chromatography (HPLC) was carried out on (Shimadzu CLASS-VP V6.12 SP5) instrument using Chiralpak AD-H (4.6mm×250mm), Chiralpak Kromasil 5-AmyCoat (4.6 mm×250mm), and Chiralcel OD-H (4.6 mm×250 mm) columns. Optical rotations were measured on a Bellingham+Stanley ADP410 Polarimeter at  $\lambda=589$  nm.

## Synthesis of L-proline hydrazide, 1

The following procedure is a partially modified one from the reported procedure in literature.<sup>1,2</sup>

A solution of L-proline (10 mmol, 1.15g) was dissolved in 5 ml of MeOH and was cooled to 0 °C followed by slow addition of 1 mL of acetyl chloride. The mixture was stirred at refluxed for 12 h and then allowed to attain room temperature. The solution was concentrated under reduced pressure. The methyl ester hydrochloride of L-proline so obtained was washed with Et<sub>2</sub>O (2×25 mL), dried over Na<sub>2</sub>SO<sub>4</sub> and concentrated under reduced pressure to give a crude brownish liquid product (1.57 g, 95%). Then to the crude product in MeOH (9 mL), 98% hydrazine hydrate (8.1 mL) was added drop wise and the mixture was stirred for 24 h. A white precipitate generated was removed by filtration and the filtrate was concentrated under reduced pressure. The yellow oily residue was washed with MeOH (2 x 20 mL) followed by drying under vacuum to give the pure product as a colourless oil (0.99 g, 81%). The <sup>1</sup>H NMR, <sup>13</sup>C NMR and IR is consistent with the literature reports.<sup>2</sup>

<sup>1</sup>H NMR (CDCl<sub>3</sub>, 400 MHz) δ 1.87 (3H, m), 2.22 (1H, m), 3.13 (2H, m), 4.01 (1H, br, s), 4.22 (1H, m), 4.77 (2H, br, s), 8.80 (1H, br, s); <sup>13</sup>C NMR (CDCl<sub>3</sub>, 101 MHz) δ 25.3, 30.8, 45.8, 59.5, 173.1; IR (film, cm<sup>-1</sup>): 3328 (NH), 3311, 3251, 3153, 3031, 2869, 1741, 1616, 1595, 1446, 1240, 1178, 1087, 894. ESI-MS (m/z): calcd for C<sub>5</sub>H<sub>11</sub>N<sub>3</sub>O [M +H]<sup>+</sup>: 130.0982; found: 130.0858.

# <sup>1</sup>H NMR Spectrum of L-Proline hydrazide, 1

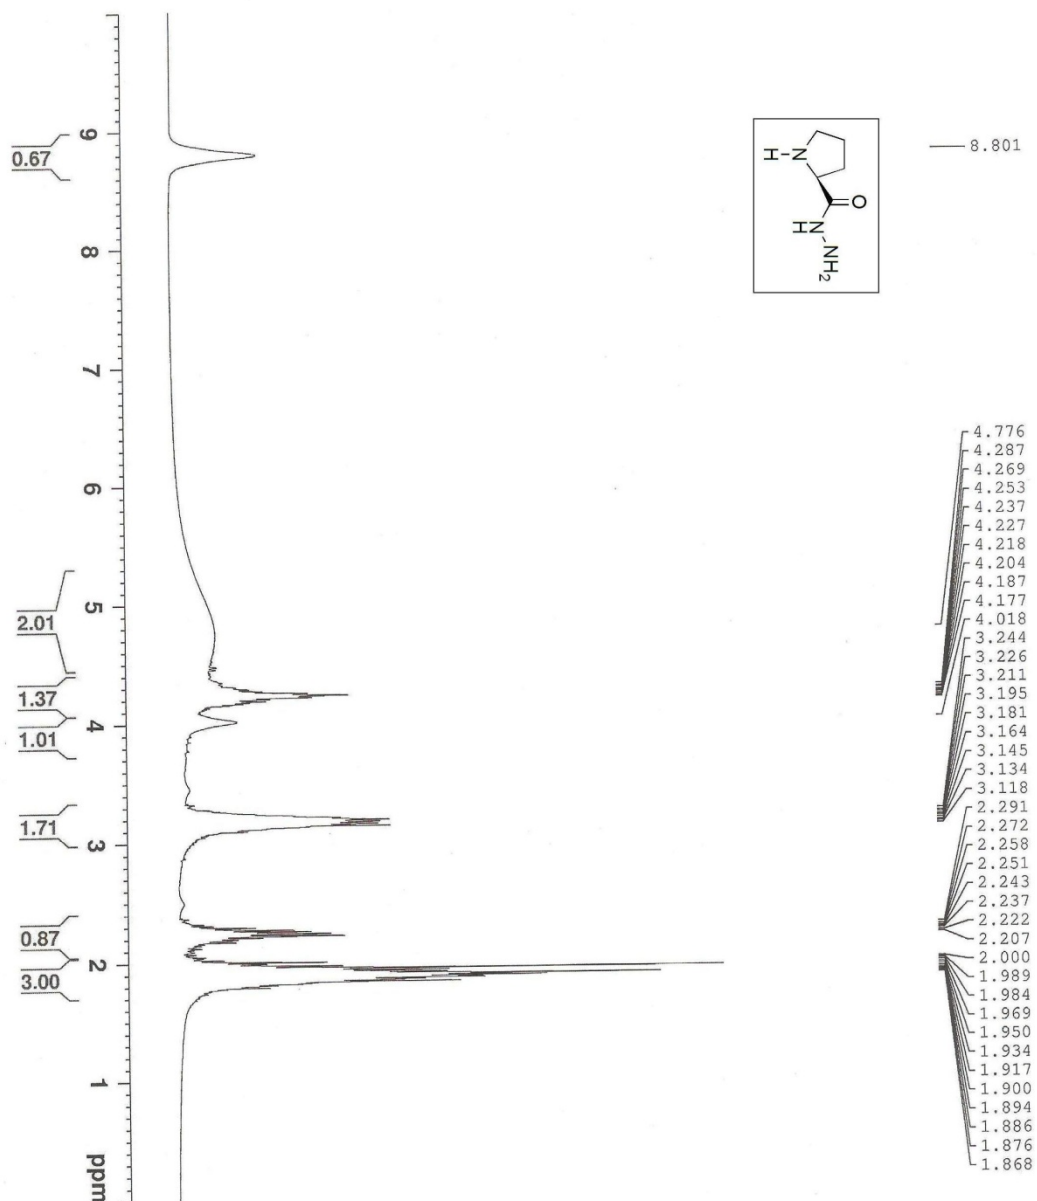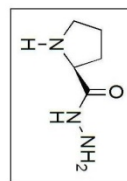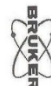

Current Data Parameters  
 NAME Dr. Kartick Chand  
 EXPNO 58  
 PROCNO 1

F2 - Acquisition Parameters  
 Date\_ 20130304  
 Time 10.07  
 INSTRUM spect  
 PROBHD zg30  
 PULPROG zg30  
 TD 32768  
 SOLVENT DMSO  
 NS 32  
 DS 2  
 SMH 8223.685 Hz  
 FIDRES 0.250967 Hz  
 AQ 1.9923444 se  
 RG 62.69  
 DW 60.800 us  
 DE 6.50 us  
 TE 291.0 K  
 D1 1.00000000 se  
 TDO 1

CHANNEL f1

NUC1 <sup>1</sup>H  
 P1 14.75 us  
 P1M1 11.99499989 W  
 SFO1 400.1524711 MHz

F2 - Processing parameters  
 SI 16384  
 SF 400.1500000 MHz  
 WDW EM  
 SSB 0  
 LB 0.30 Hz  
 GB 0  
 PC 1.00

# <sup>13</sup>C NMR Spectrum of L-Proline hydrazide, 1

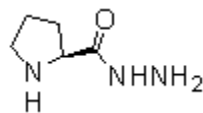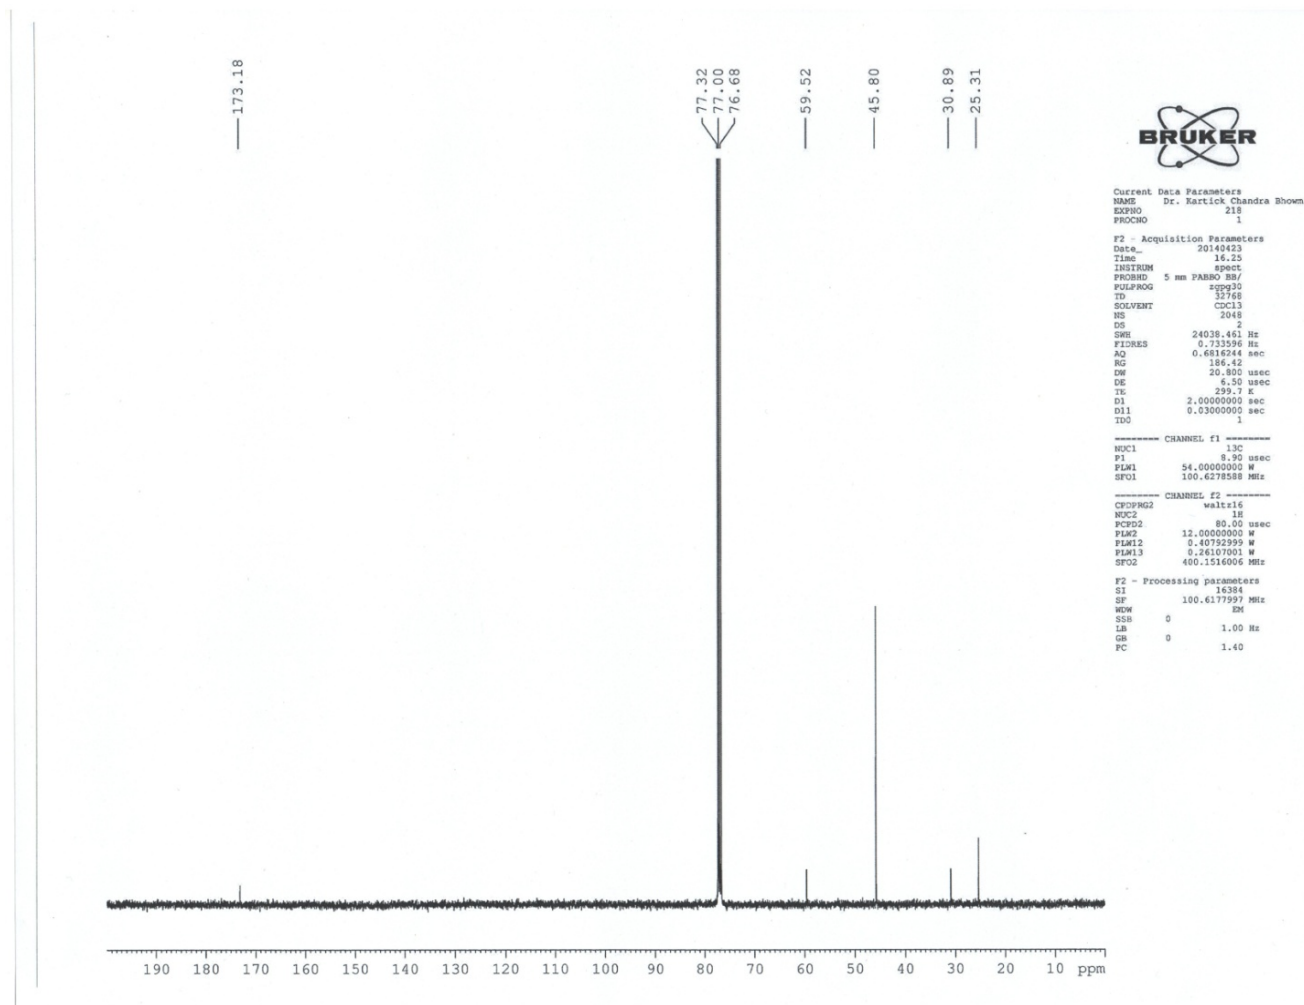

# FT-IR Spectrum of L-Proline hydrazide, 1

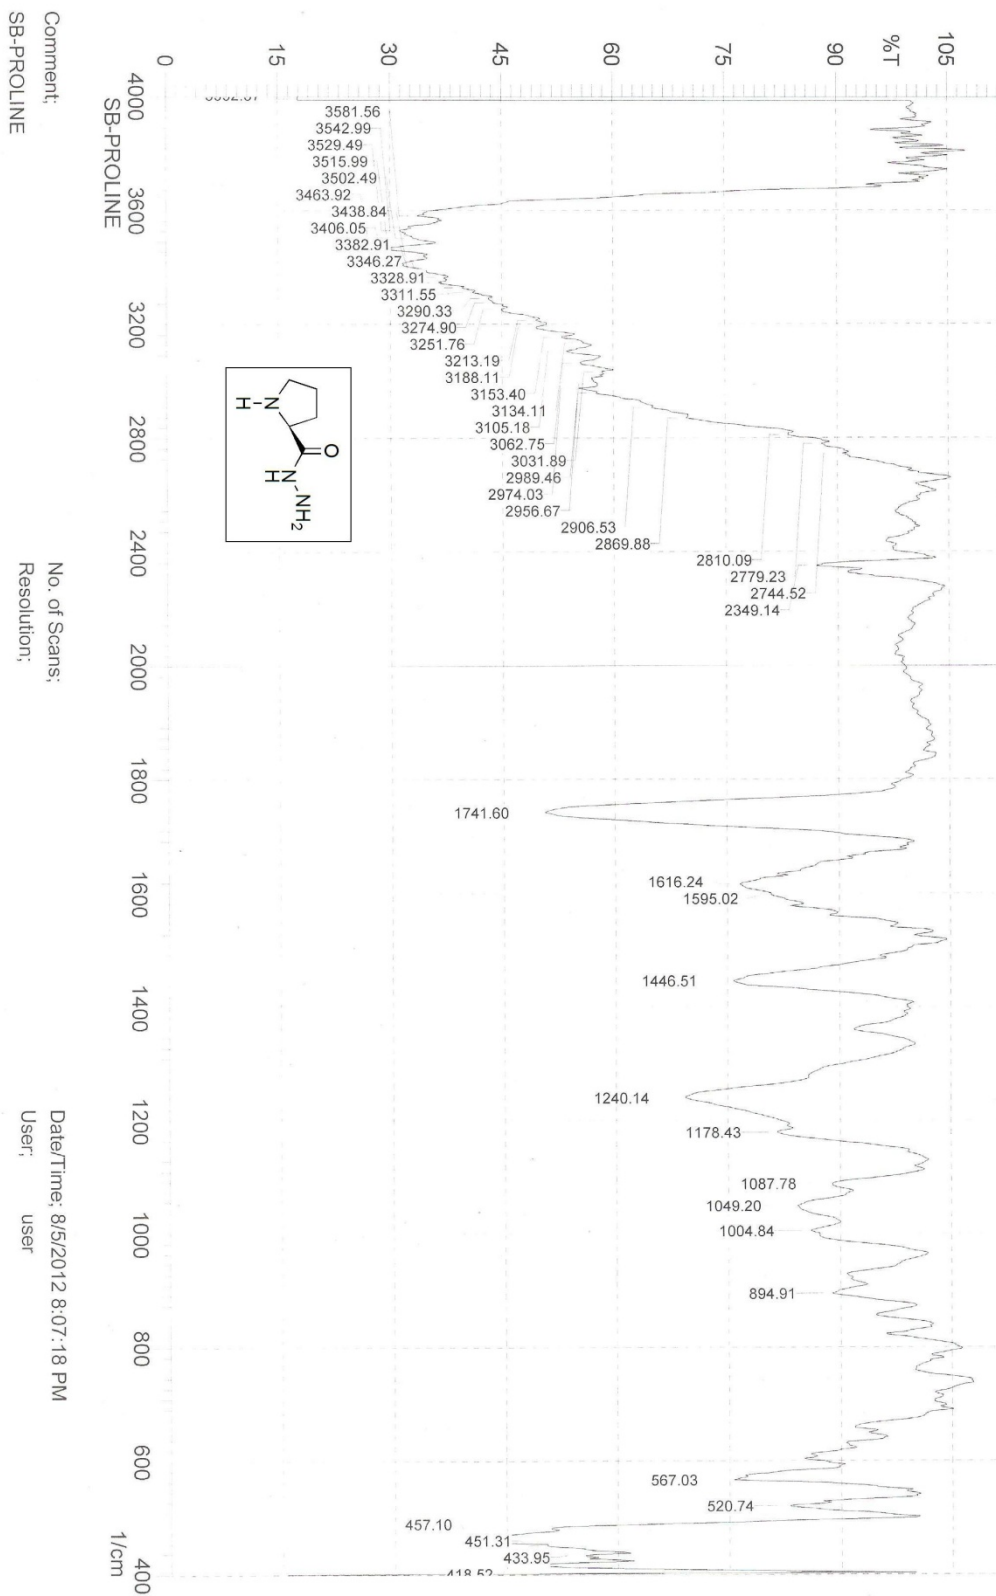

SR-262

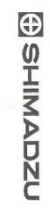

Comment: SB-PROLINE  
 No. of Scans:  
 Resolution:  
 Date/Time: 8/5/2012 8:07:18 PM  
 User: user

# ESI-MS Spectrum of L-Proline hydrazide, 1

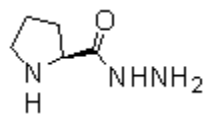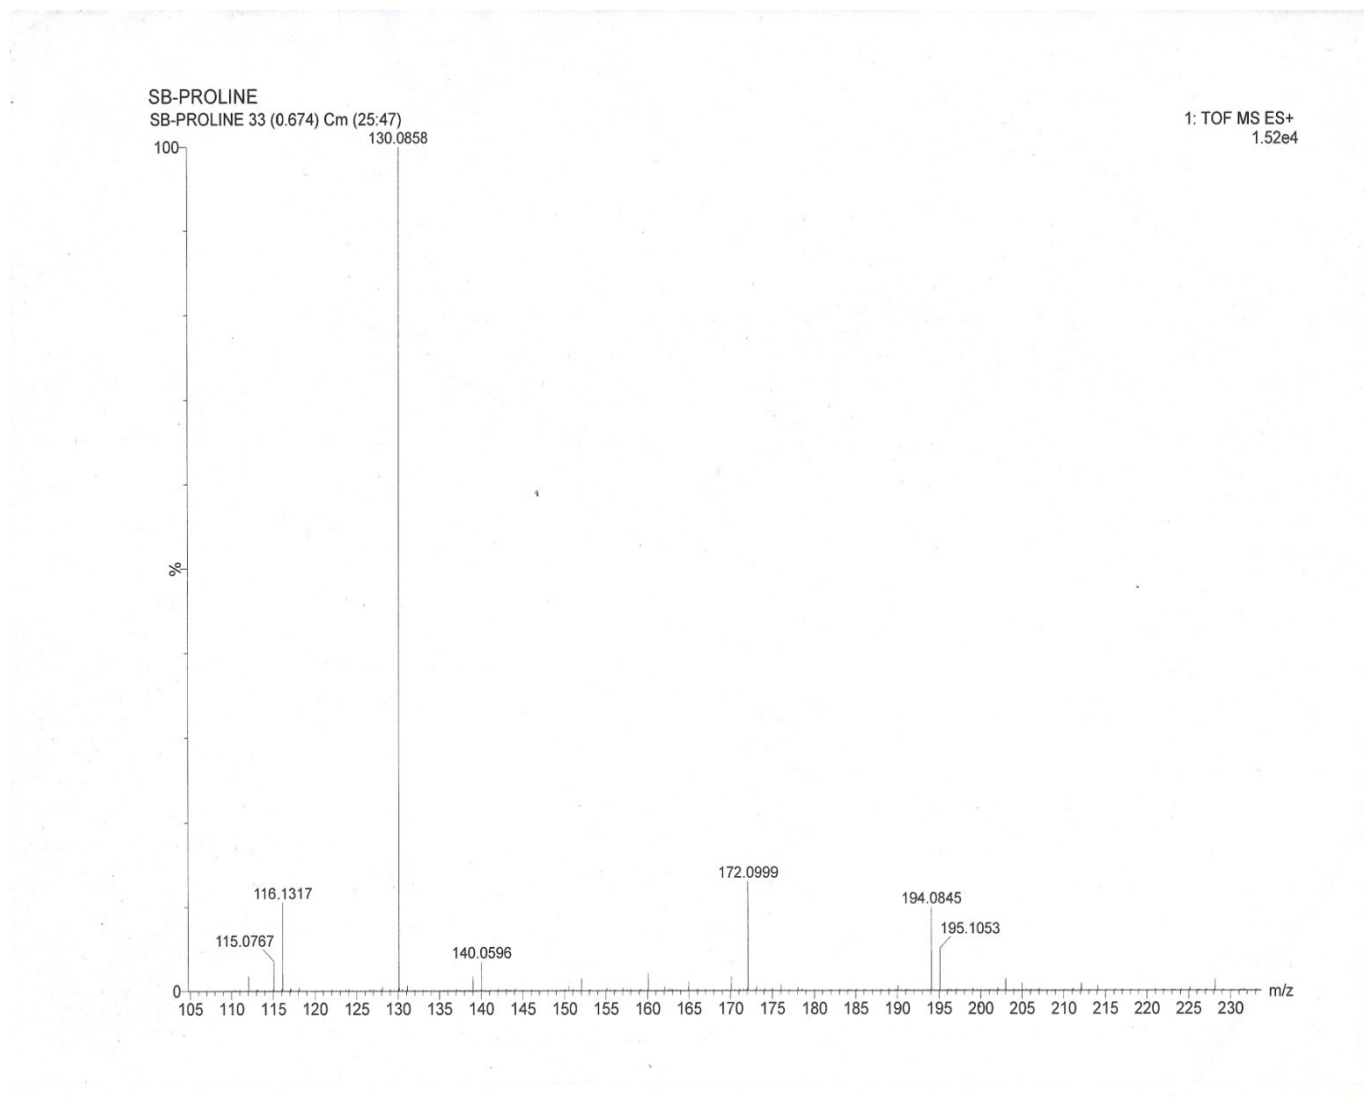

### General procedure for the enantioselective direct aldol reaction.

To a mixture of catalyst **1** (0.1 mmol) and acid additive (0.05 mmol) in water (0.01 mL), ketone (4.0 mmol) was added followed by aromatic aldehyde (1.0 mmol). The resulting mixture was stirred at room temperature, an emulsion was formed. The reaction was monitored by TLC. It was then quenched with 10 mL of saturated NaHCO<sub>3</sub> solution, extracted with EtOAc (3×10 mL), and brine (15 mL), dried over Na<sub>2</sub>SO<sub>4</sub>. Purification by column chromatography afforded the corresponding pure products as a mixture of *syn* and *anti* isomers. The ee of the *anti* isomers were determined by chiral HPLC analysis.

### HPLC data for chiral aldol products

#### (2*S*,1'*R*)-2-[Hydroxy(4-nitrophenyl)methyl]cyclohexan-1-one (**2a**).<sup>3</sup>

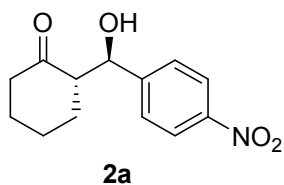

The spectroscopic NMR data are in agreement with the previously reported ones.<sup>3</sup> The enantiomeric excess of this sample was determined to be 97% by chiral HPLC analysis (Chiralpak Kromasil 5-CelluCoat, hexanes/*i*PrOH 95/5), flow rate = 1.0 mL/min;  $\lambda$  = 254 nm;  $t_R$  (major)=24.5 min,  $t_R$  (minor)=34.9 min.

#### (2*S*,1'*R*)-2-[Hydroxy(3-nitrophenyl)methyl]cyclohexan-1-one (**2b**).<sup>4</sup>

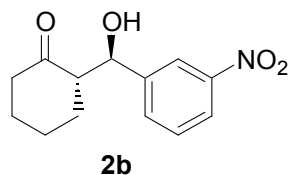

The spectroscopic NMR data are in agreement with the previously reported ones.<sup>4</sup> The enantiomeric excess of this sample was determined to be 98% by chiral HPLC analysis



Chiralcel-OD-H (250 x 4.6 mm), Mobile phase: IPA:n-Hexane (15:85), flow rate = 0.5 mL/min;  
 $\lambda = 254 \text{ nm}$ ;  $t_R$  (major) = 20.7 min,  $t_R$  (minor) = 27.9 min.

**(2*S*,1'*R*)-2-[Hydroxy(2-nitrophenyl)methyl]cyclohexan-1-one (2c).**<sup>3</sup>

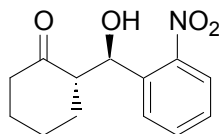

**2c**

The spectroscopic NMR data are in agreement with the previously reported ones.<sup>3</sup> The enantiomeric excess of this sample was determined to be 88% by chiral HPLC analysis Chiralcel-OD-H (250 x 4.6 mm), Mobile phase: IPA:n-Hexane (15:85), flow rate = 0.5 mL/min;  $\lambda = 254 \text{ nm}$ ;  $t_R$  (major) = 17.5 min,  $t_R$  (minor) = 20.0 min.

**(2*S*,1'*R*)-2-[Hydroxy(2-fluorophenyl)methyl]cyclohexan-1-one (2d).**<sup>5</sup>

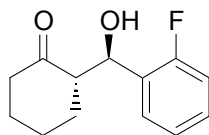

**2d**

The spectroscopic NMR data are in agreement with the previously reported ones.<sup>5</sup> The enantiomeric excess of this sample was determined to be 68% by chiral HPLC analysis Chiralcel-OD-H (250 x 4.6 mm), Mobile phase: IPA:n-Hexane (05:95), Flow rate: 0.5 mL/min;  $\lambda = 254 \text{ nm}$ ;  $t_R$  (major) = 16.2 min,  $t_R$  (minor) = 20.7 min.

**(2*S*,1'*R*)-2-[Hydroxy(3-fluorophenyl)methyl]cyclohexan-1-one (2e).**

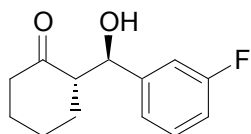

**2e**

The spectroscopic NMR data are in agreement with the previously reported ones. The enantiomeric excess of this sample was determined to be 32% by chiral HPLC analysis Chiralcel-OD-H (250 x 4.6 mm), Mobile phase: IPA:n-Hexane (05:95), Flow rate: 0.5 mL/min;  $\lambda = 254$  nm;  $t_R$  (minor) = 16.5 min,  $t_R$  (major) = 18.5 min.

**(2*S*,1'*R*)-2-[Hydroxy(2-methoxyphenyl)methyl]cyclohexan-1-one (2f).<sup>6</sup>**

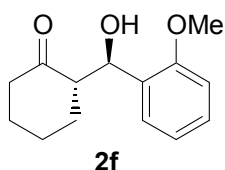

The spectroscopic NMR data are in agreement with the previously reported ones.<sup>6</sup> The enantiomeric excess of this sample was determined to be 89% by chiral HPLC analysis Chiralcel-OD-H (250 x 4.6 mm), Mobile phase: IPA:n-Hexane (05:95), Flow rate: 0.5 mL/min;  $\lambda = 254$  nm;  $t_R$  (major) = 24.8 min,  $t_R$  (minor) = 28.8 min.

**(2*S*,1'*R*)-2-[Hydroxy(2-chlorophenyl)methyl]cyclohexan-1-one (2g).<sup>3</sup>**

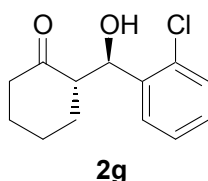

The spectroscopic NMR data are in agreement with the previously reported ones.<sup>3</sup> The enantiomeric excess of this sample was determined to be 64% by chiral HPLC analysis Chiralcel-OD-H (250 x 4.6 mm), Mobile phase: IPA:n-Hexane (05:95), Flow rate: 0.5 mL/min;  $\lambda = 254$  nm;  $t_R$  (major) = 12.1 min,  $t_R$  (minor) = 17.0 min.

**(2*S*,1'*R*)-2-[Hydroxy(3-chlorophenyl)methyl]cyclohexan-1-one (2h).<sup>3</sup>**

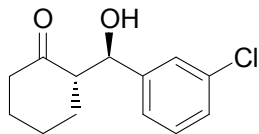

**2h**

The spectroscopic NMR data are in agreement with the previously reported ones.<sup>3</sup> The enantiomeric excess of this sample was determined to be 46% by chiral HPLC analysis Chiralcel-OD-H (250 x 4.6 mm), Mobile phase: IPA:n-Hexane (05:95), Flow rate: 0.5 mL/min;  $\lambda = 254$  nm;  $t_R$  (major) = 19.2 min,  $t_R$  (minor) = 21.0 min.

**(2*S*,1'*R*)-2-[Hydroxy(4-chlorophenyl)methyl]cyclohexan-1-one (2i).<sup>3</sup>**

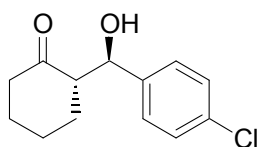

**2i**

The spectroscopic NMR data are in agreement with the previously reported ones.<sup>3</sup> The enantiomeric excess of this sample was determined to be 91% by chiral HPLC analysis Chiralcel-OD-H (250 x 4.6 mm), Mobile phase: IPA:n-Hexane (10:90), Flow rate: 0.5 mL/min;  $\lambda = 254$  nm;  $t_R$  (major) = 16.5 min,  $t_R$  (minor) = 18.8 min.

**(2*S*,1'*R*)-2-[Hydroxy(4-methylphenyl)methyl]cyclohexan-1-one (2j).<sup>4</sup>**

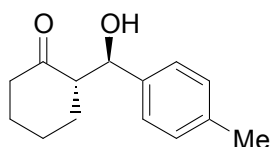

**2j**

The spectroscopic NMR data are in agreement with the previously reported ones.<sup>4</sup> The enantiomeric excess of this sample was determined to be 49% by chiral HPLC analysis Chiralcel-OD-H (250 x 4.6 mm), Mobile phase: IPA:n-Hexane (3:97), Flow rate: 0.5 mL/min;

$\lambda = 254 \text{ nm}$ ;  $t_R$  (major) = 14.2 min,  $t_R$  (minor) = 18.6 min.

**(2*S*, 1'*R*)-2-[Hydroxy(naphthalen-1-yl)methyl]cyclohexan-1-one (2k).<sup>4</sup>**

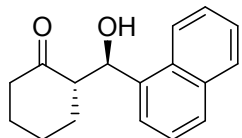

**2k**

The spectroscopic NMR data are in agreement with the previously reported ones.<sup>4</sup> The enantiomeric excess of this sample was determined to be 44% by chiral HPLC analysis Chiralcel-OD-H (250 x 4.6 mm), Mobile phase: IPA:n-Hexane (3:97), Flow rate: 0.5 mL/min;

$\lambda = 254 \text{ nm}$ ;  $t_R$  (major) = 16.2 min,  $t_R$  (minor) = 23.5 min.

**(2*S*, 1'*R*)-2-[Hydroxy(naphthalen-2-yl)methyl]cyclohexan-1-one (2l).<sup>4</sup>**

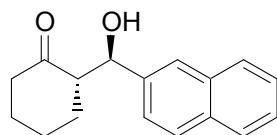

**2l**

The spectroscopic NMR data are in agreement with the previously reported ones.<sup>4</sup> The enantiomeric excess of this sample was determined to be 61% by chiral HPLC analysis Chiralcel-OD-H (250 x 4.6 mm), Mobile phase: IPA:n-Hexane (10:90), Flow rate: 0.5 mL/min;

$\lambda = 254 \text{ nm}$ ;  $t_R$  (major) = 26.4 min,  $t_R$  (minor) = 33.4 min.

**(2*S*, 1'*R*)-2-[Hydroxy(4-trifluoromethylphenyl)methyl]cyclohexan-1-one (2m).<sup>4</sup>**

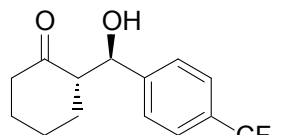

**2m**

The spectroscopic NMR data are in agreement with the previously reported ones.<sup>4</sup> The enantiomeric excess of this sample was determined to be 80% by chiral HPLC analysis Chiralcel OD-H (250 x 4.6 mm), Mobile phase: IPA:n-Hexane (20:80), Flow rate: 0.5 mL/min;  $\lambda = 254$  nm;  $t_R$  (major) = 19.3 min,  $t_R$  (minor) = 21.4 min.

**(4*R*)-4-Hydroxy-p-nitrophenylbutan-2-one (3a).**<sup>7</sup>

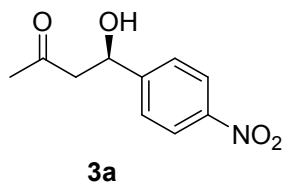

The spectroscopic NMR data are in agreement with the previously reported ones.<sup>7</sup> The enantiomeric excess of this sample was determined to be 98% by chiral HPLC analysis Chiralcel-OD-H (250 x 4.6 mm), Mobile phase: IPA:n-Hexane (8.5:91.5), Flow rate: 0.7 mL/min;  $\lambda = 254$  nm;  $t_R$  (major) = 38.2 min,  $t_R$  (minor) = 45.0 min.

**(2*S*,1'*R*)-2-[Hydroxy(4-nitrophenyl)methyl]cyclopentan-1-one (3b).**<sup>7</sup>

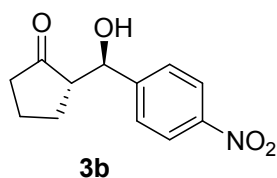

The spectroscopic NMR data are in agreement with the previously reported ones. The enantiomeric excess of this sample was determined to be >99.9% by chiral HPLC analysis Chiralpak Kromasil-5AmyCoat (254 x 4.6), Mobile phase: IPA:Pet Ether (10:90), Flow rate : 1 mL/min;  $\lambda = 265$  nm;  $t_R$  (minor) = 20.0 min,  $t_R$  (major) = 21.5 min.

## References:

1. V. Gauchot and A. R. Schmitzer, *J. Org. Chem.*, 2012, **77**, 4917-4923.
2. A. Kudelko, W. Zielinski and K. Ejsmont, *Tetrahedron*, 2011, **67**, 7838-7845.
3. M. Gruttadauria, F. Giacalone, A. M. Marculescu, P. Lo Meo, S. Riela and R. Noto, *Eur. J. Org. Chem.*, 2007, 4688-4698.
4. C. Wu, X. Fu, X. Ma and S. Li, *Tetrahedron: Asymmetry*, 2010, **21**, 2465-2470.
5. F. Giacalone, M. Gruttadauria, P. Lo Meo, S. Riela and R. Noto, *Adv. Synth. Catal.*, 2008, **350**, 2747-2760.
6. Y. -J. An, Y. -X. Zhang, Y. Wu, Z. -M. Liu, C. Pi and J. -C. Tao, *Tetrahedron: Asymmetry*, 2010, **21**, 688-694.
7. N. Mase, Y. Nakai, N. Ohara, H. Yoda, K. Takabe, F. Tanaka and C. F. Barbas III, *J. Am. Chem. Soc.* 2006, **128**, 734-735.

**2a (Racemic) (HPLC Conditions: Chiralpak Kromasil 5-CelluCoat, hexanes/iPrOH 95/5), flow rate = 0.7 mL/min;  $\lambda$  = 254 nm)**

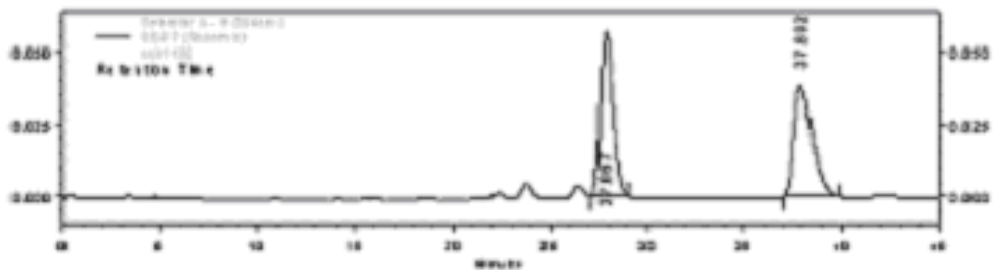

| Retention Time | C Area  | Area % |
|----------------|---------|--------|
| 27.867         | 2464786 | 49.733 |
| 37.892         | 2491264 | 50.267 |

**2a (Chiral HPLC done under conditions mentioned in the above experimental section)**

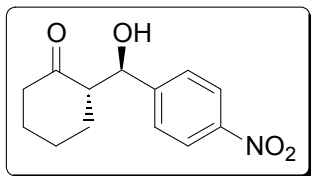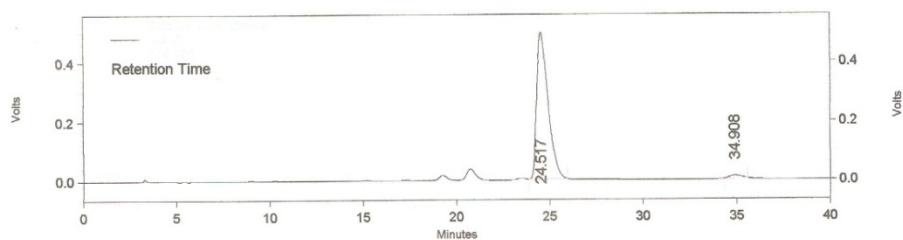

| Detector A - 1 (254nm) |          |         |  |
|------------------------|----------|---------|--|
| Retention Time         | C Area   | Area %  |  |
| 24.517                 | 20943388 | 98.181  |  |
| 34.908                 | 387911   | 1.819   |  |
| Totals                 | 21331299 | 100.000 |  |

**2b (Racemic) (HPLC conditions: Chiralcel OD-H (250 x 4.6 mm), IPA:n-Hexane (15:85), flow rate = 0.7 mL/min;  $\lambda$  = 254 nm)**

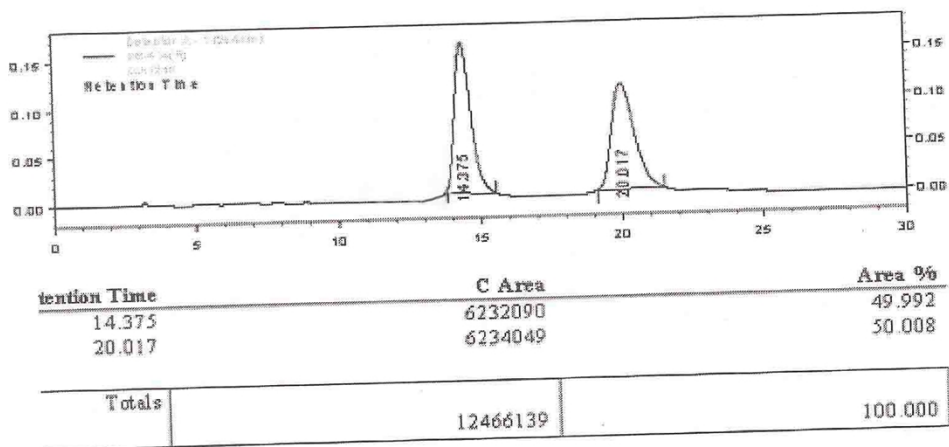

**2b (Chiral HPLC done under conditions mentioned in the above experimental section)**

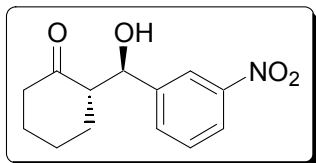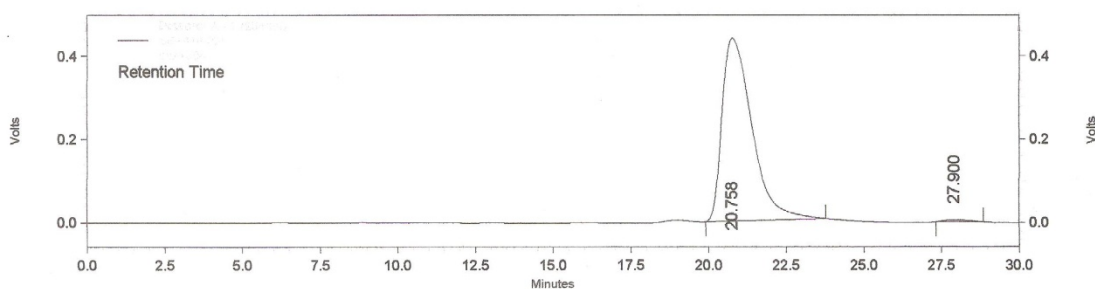

| Detector A - 1 (254nm) |                |          |         |
|------------------------|----------------|----------|---------|
| Pk #                   | Retention Time | Area     | Area %  |
| 1                      | 20.758         | 29329234 | 99.160  |
| 2                      | 27.900         | 248385   | 0.840   |
| Totals                 |                | 29577619 | 100.000 |



**2c (Racemic) (HPLC conditions: Chiralcel OD-H (250 x 4.6 mm), IPA:n-Hexane (10:90), flow rate = 0.7 mL/min;  $\lambda$  = 254 nm)**

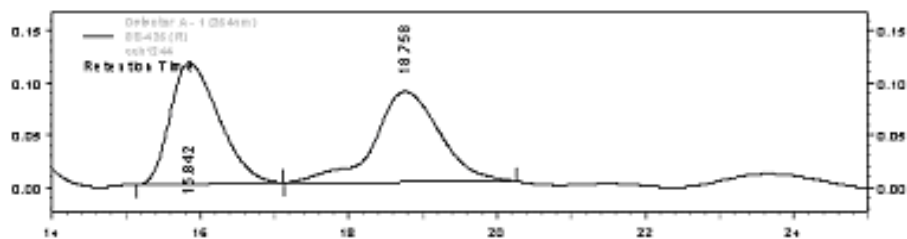

| Retention Time | C Area          | Area %         |
|----------------|-----------------|----------------|
| 15.842         | 5292208         | 49.828         |
| 18.758         | 5328658         | 50.172         |
| <b>Totals</b>  | <b>10620866</b> | <b>100.000</b> |

**2c (Chiral HPLC done under conditions mentioned in the above experimental section)**

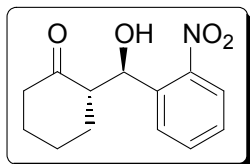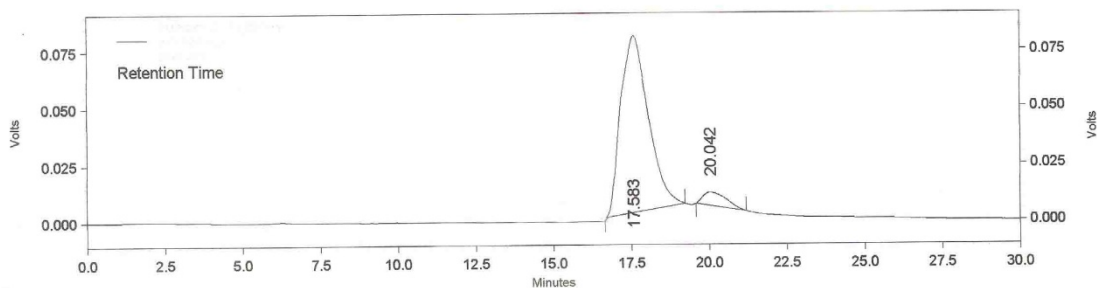

| Detector A - 1 (254nm) |                |                |                |
|------------------------|----------------|----------------|----------------|
| Pk #                   | Retention Time | Area           | Area %         |
| 1                      | 17.583         | 4820161        | 94.009         |
| 2                      | 20.042         | 307167         | 5.991          |
| <b>Totals</b>          |                | <b>5127328</b> | <b>100.000</b> |

**2d (Racemic) (HPLC conditions:** Chiralcel OD-H (250 x 4.6 mm), IPA:n-Hexane (05:95),  
Flow rate: 0.7 ml/min;  $\lambda = 254$  nm;  $t_R$  (major) = 12.2 min,  $t_R$  (minor) = 16.3 min.)

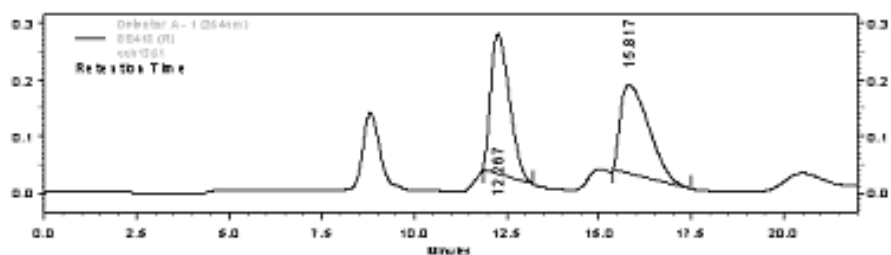

| Retention Time | C Area   | Area %  |
|----------------|----------|---------|
| 12.267         | 8714354  | 50.730  |
| 15.817         | 8463523  | 49.270  |
| Totals         | 17177877 | 100.000 |

**2d (Chiral HPLC done under conditions mentioned in the above experimental section)**

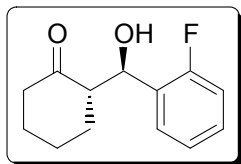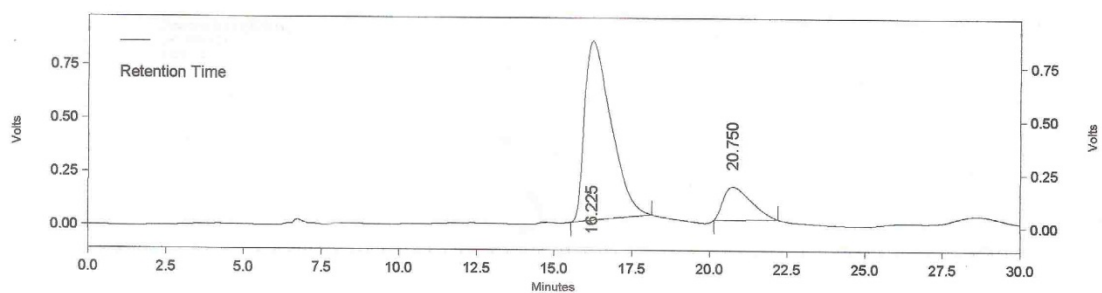

Detector A - 1 (254nm)

| Pk #   | Retention Time | Area     | Area %  |
|--------|----------------|----------|---------|
| 1      | 16.225         | 49988442 | 83.764  |
| 2      | 20.750         | 9689486  | 16.236  |
| Totals |                | 59677928 | 100.000 |

**2e (Racemic) (HPLC conditions: Chiralcel OD-H (250 x 4.6 mm), IPA:n-Hexane (05:95), Flow rate: 0.7 ml/min;  $\lambda = 254$  nm)**

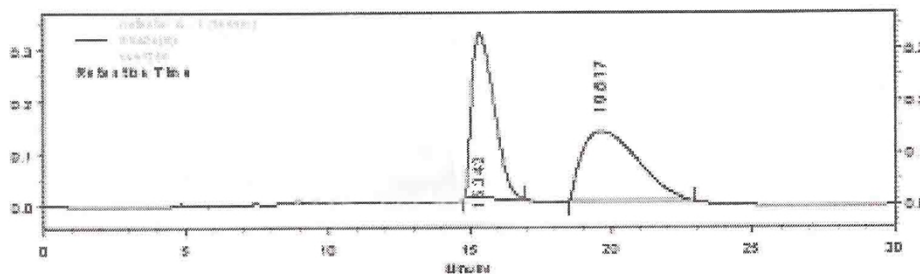

| Retention Time | C Area   | Area %  |
|----------------|----------|---------|
| 15.342         | 17574818 | 48.473  |
| 19.617         | 18682253 | 51.527  |
| Totals         | 36257071 | 100.000 |

**2e (Chiral HPLC done under conditions mentioned in the above experimental section)**

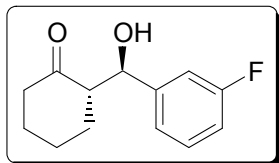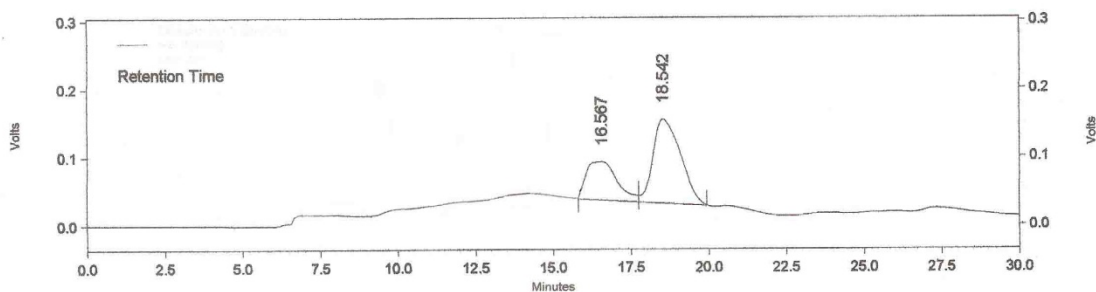

Detector A - 1 (254nm)

| Pk #   | Retention Time | Area     | Area %  |
|--------|----------------|----------|---------|
| 1      | 16.567         | 3890271  | 33.801  |
| 2      | 18.542         | 7619096  | 66.199  |
| Totals |                | 11509367 | 100.000 |

**2f (Racemic) (HPLC conditions: Chiralcel OD-H (250 x 4.6 mm), IPA:n-Hexane (05:95), Flow rate: 0.7 ml/min;  $\lambda$  = 254 nm)**

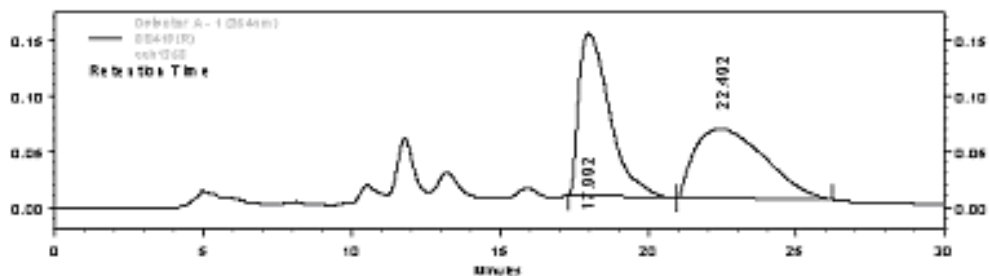

| Retention Time | C Area   | Area %         |
|----------------|----------|----------------|
| 17.992         | 10643567 | 50.766         |
| 22.492         | 10322192 | 49.234         |
| <b>Totals</b>  |          | <b>100.000</b> |

**2f (Chiral HPLC done under conditions mentioned in the above experimental section)**

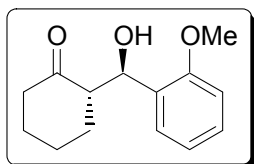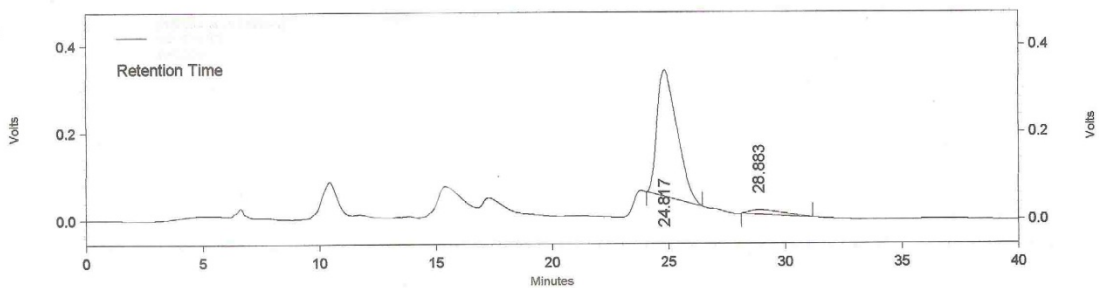

| Detector A - 1 (254nm) |                |                 |                |
|------------------------|----------------|-----------------|----------------|
| PK #                   | Retention Time | Area            | Area %         |
| 1                      | 24.817         | 17408725        | 94.432         |
| 2                      | 28.883         | 1026463         | 5.568          |
| <b>Totals</b>          |                | <b>18435188</b> | <b>100.000</b> |

**2g (Racemic) (HPLC conditions: Chiralcel OD-H (250 x 4.6 mm), IPA:n-Hexane (05:95), Flow rate: 0.7 ml/min;  $\lambda = 254$  nm)**

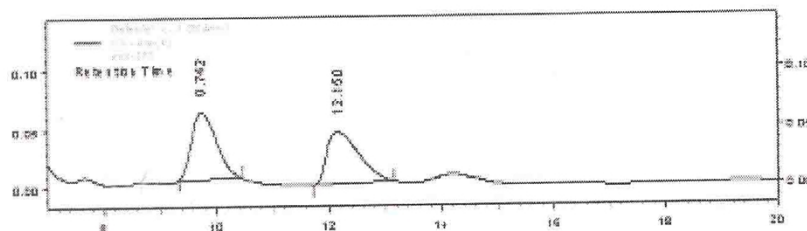

| Retention Time | C Area         | Area %         |
|----------------|----------------|----------------|
| 9.742          | 1741746        | 50.307         |
| 12.150         | 1720479        | 49.693         |
| <b>Totals</b>  | <b>3462225</b> | <b>100.000</b> |

**2g (Chiral HPLC done under conditions mentioned in the above experimental section)**

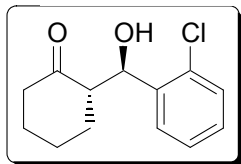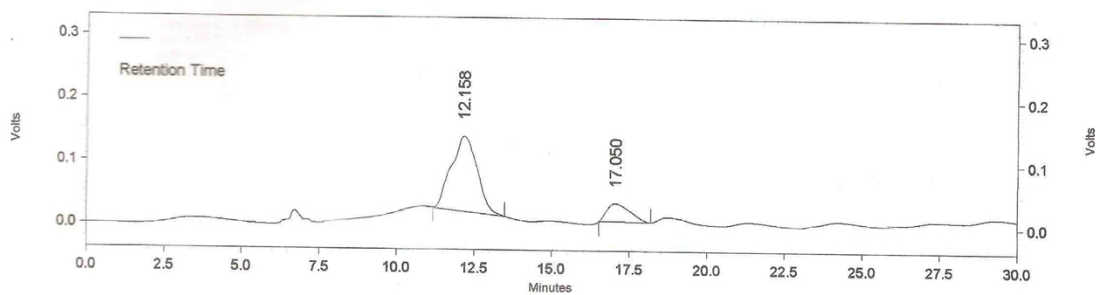

Detector A - 1 (254nm)

| Pk #          | Retention Time | Area           | Area %         |
|---------------|----------------|----------------|----------------|
| 1             | 12.158         | 6932352        | 82.173         |
| 2             | 17.050         | 1503941        | 17.827         |
| <b>Totals</b> |                | <b>8436293</b> | <b>100.000</b> |

**2h (Racemic) (HPLC conditions: Chiralcel OD-H (250 x 4.6 mm), IPA:n-Hexane (05:95), Flow rate: 0.7 ml/min;  $\lambda = 254$  nm)**

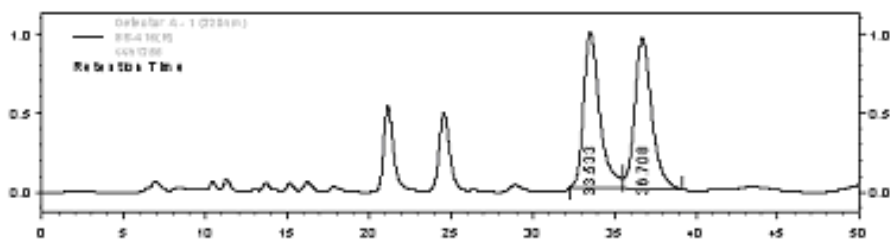

| Retention Time | C Area           | Area %         |
|----------------|------------------|----------------|
| 33.533         | 67083106         | 49.133         |
| 36.708         | 69449347         | 50.867         |
| <b>Totals</b>  | <b>136532453</b> | <b>100.000</b> |

**2h (Chiral HPLC done under conditions mentioned in the above experimental section)**

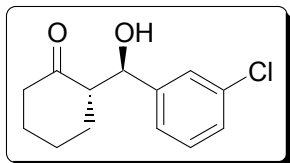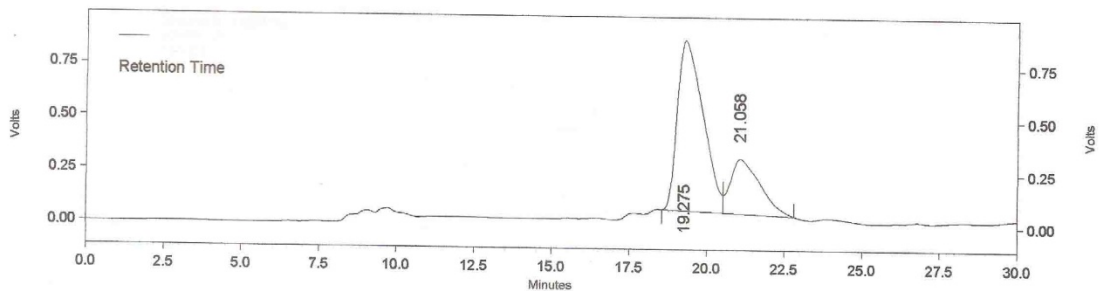

| Detector A - 1 (254nm) | Pk # | Retention Time | Area            | Area %         |
|------------------------|------|----------------|-----------------|----------------|
|                        | 1    | 19.275         | 46804610        | 72.919         |
|                        | 2    | 21.058         | 17382431        | 27.081         |
| <b>Totals</b>          |      |                | <b>64187041</b> | <b>100.000</b> |

**2i (Racemic) (HPLC conditions: Chiralcel OD-H (250 x 4.6 mm), IPA:n-Hexane (15:85), Flow rate: 0.7 ml/min;  $\lambda = 254$  nm)**

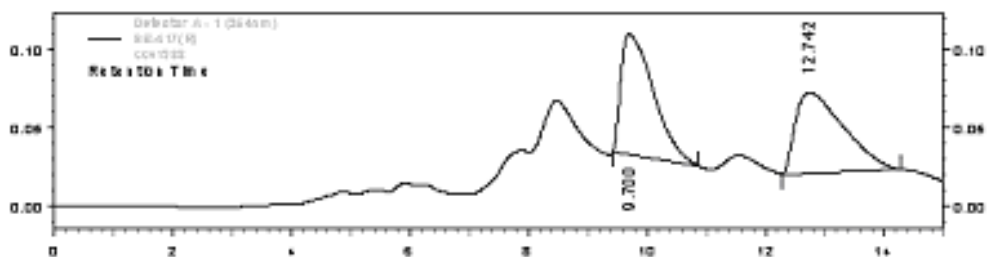

| Retention Time | C Area  | Area %  |
|----------------|---------|---------|
| 9.700          | 2938444 | 50.546  |
| 12.742         | 2874979 | 49.454  |
| Totals         | 5813423 | 100.000 |

**2i (Chiral HPLC done under conditions mentioned in the above experimental section)**

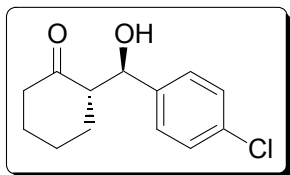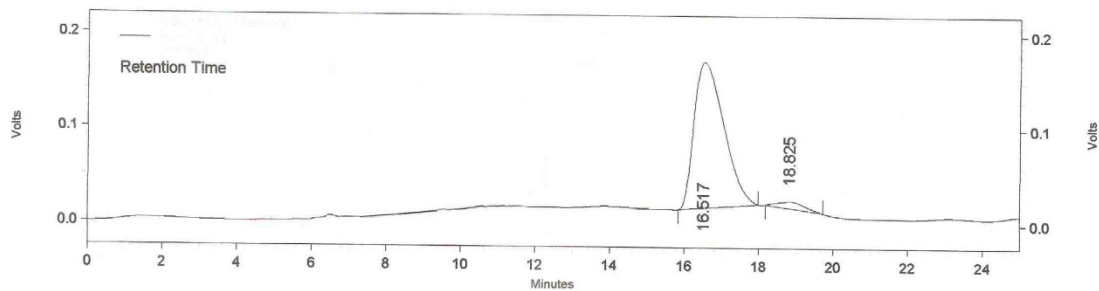

Detector A - 1 (254nm)

| Pk #   | Retention Time | Area    | Area %  |
|--------|----------------|---------|---------|
| 1      | 16.517         | 8518553 | 95.738  |
| 2      | 18.825         | 379267  | 4.262   |
| Totals |                | 8897820 | 100.000 |

**2j (Racemic) (HPLC conditions: Chiralcel OD-H (250 x 4.6 mm), IPA:n-Hexane (3:97), Flow rate: 1 ml/min;  $\lambda$  = 254 nm)**

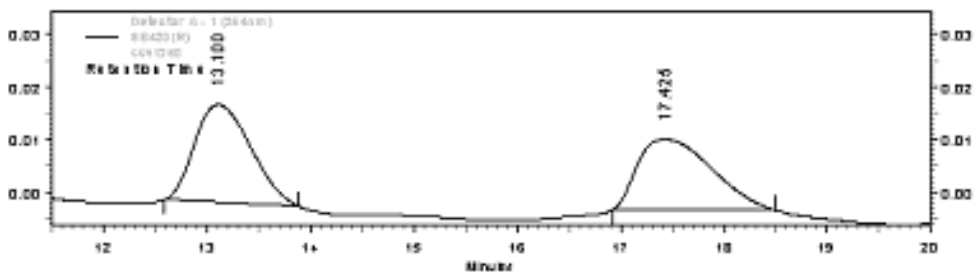

| Retention Time | C Area        | Area %         |
|----------------|---------------|----------------|
| 13.100         | 233973        | 51.176         |
| 17.425         | 223220        | 48.824         |
| <b>Totals</b>  | <b>457193</b> | <b>100.000</b> |

**2j (Chiral HPLC done under conditions mentioned in the above experimental section)**

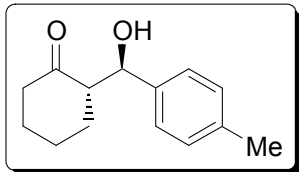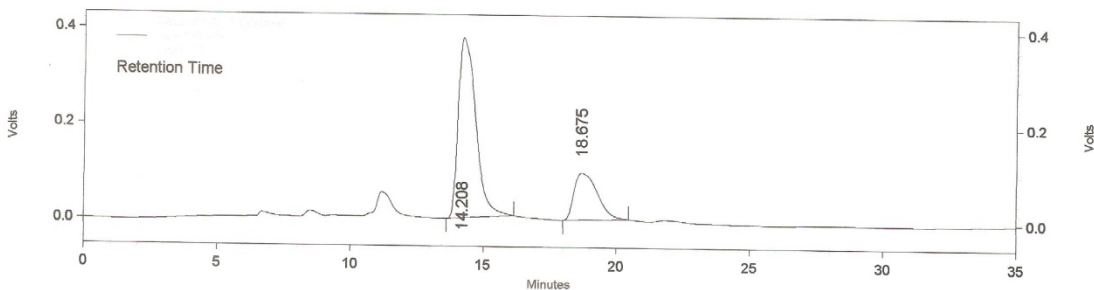

| Detector A - 1 (254nm) |                |                 |                |
|------------------------|----------------|-----------------|----------------|
| Pk #                   | Retention Time | Area            | Area %         |
| 1                      | 14.208         | 17287453        | 74.368         |
| 2                      | 18.675         | 5958510         | 25.632         |
| <b>Totals</b>          |                | <b>23245963</b> | <b>100.000</b> |



**2k (Racemic) (HPLC conditions: Chiralcel OD-H (250 x 4.6 mm), IPA:n-Hexane (3:97), Flow rate: 1 ml/min;  $\lambda = 254$  nm)**

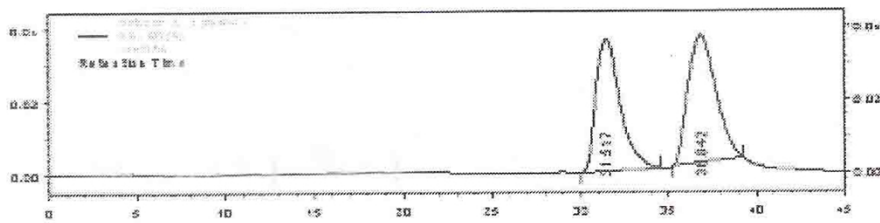

| Retention Time | C Area  | Area %  |
|----------------|---------|---------|
| 31.517         | 3431581 | 47.140  |
| 36.842         | 3847940 | 52.860  |
| Totals         | 7279521 | 100.000 |

**2k (Chiral HPLC done under conditions mentioned in the above experimental section)**

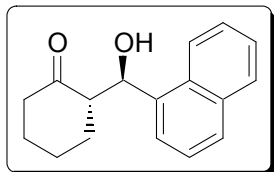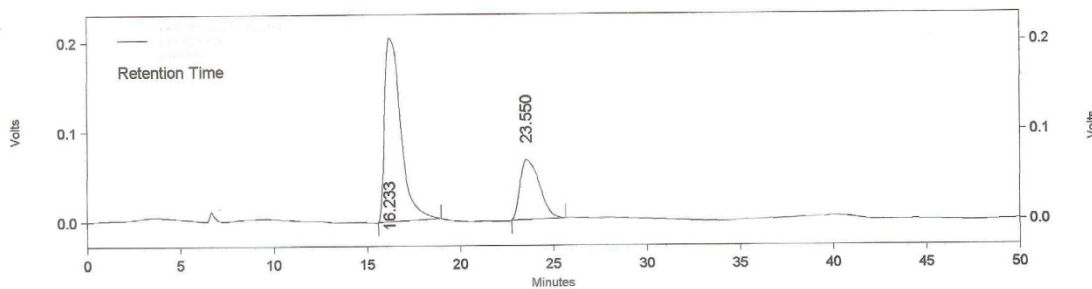

Detector A - 1 (254nm)

| Pk #   | Retention Time | Area     | Area %  |
|--------|----------------|----------|---------|
| 1      | 16.233         | 12406598 | 72.112  |
| 2      | 23.550         | 4798023  | 27.888  |
| Totals |                | 17204621 | 100.000 |

**2l (Racemic) (HPLC conditions:** Chiralcel OD-H (250 x 4.6 mm), IPA:n-Hexane (10:90), Flow rate: 0.7 ml/min;  $\lambda = 254$  nm)

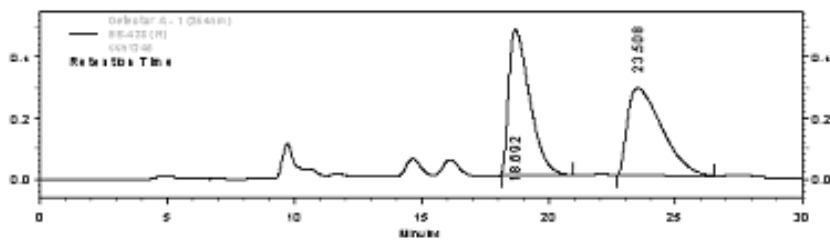

| Retention Time | C Area          | Area %         |
|----------------|-----------------|----------------|
| 18.692         | 27382960        | 50.208         |
| 23.508         | 27155710        | 49.792         |
| <b>Totals</b>  | <b>54538670</b> | <b>100.000</b> |

**2l (Chiral HPLC done under conditions mentioned in the above experimental section)**

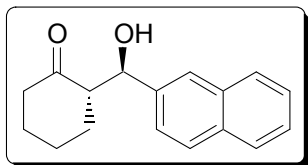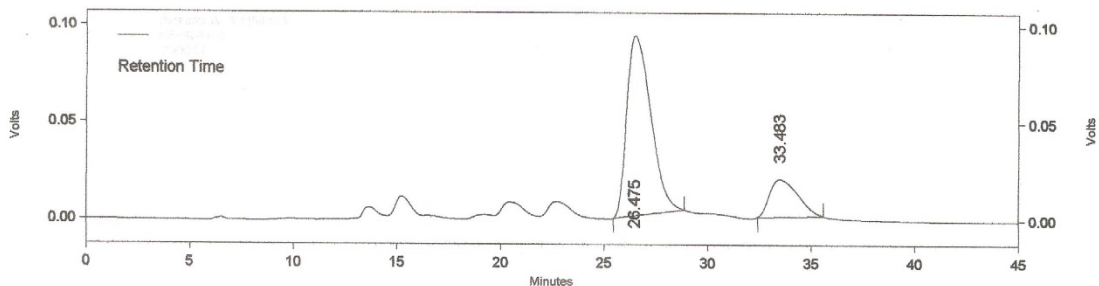

Detector A - 1 (254nm)

| Pk #          | Retention Time | Area           | Area %         |
|---------------|----------------|----------------|----------------|
| 1             | 26.475         | 7503953        | 80.344         |
| 2             | 33.483         | 1835873        | 19.656         |
| <b>Totals</b> |                | <b>9339826</b> | <b>100.000</b> |

**2m (Racemic) (HPLC conditions: Chiralcel OD-H (250 x 4.6 mm), Mobile phase: IPA:n-Hexane (20:80), Flow rate: 0.5 ml/min;  $\lambda = 254$  nm)**

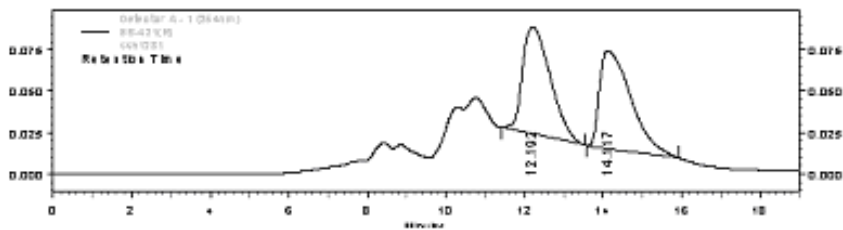

| Retention Time | C Area  | Area %  |
|----------------|---------|---------|
| 12.192         | 3203444 | 49.349  |
| 14.117         | 3288005 | 50.651  |
| Totals         | 6491449 | 100.000 |

**2m (Chiral HPLC done under conditions mentioned in the above experimental section)**

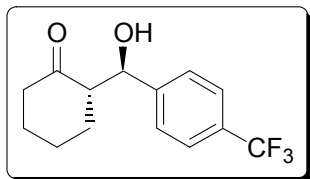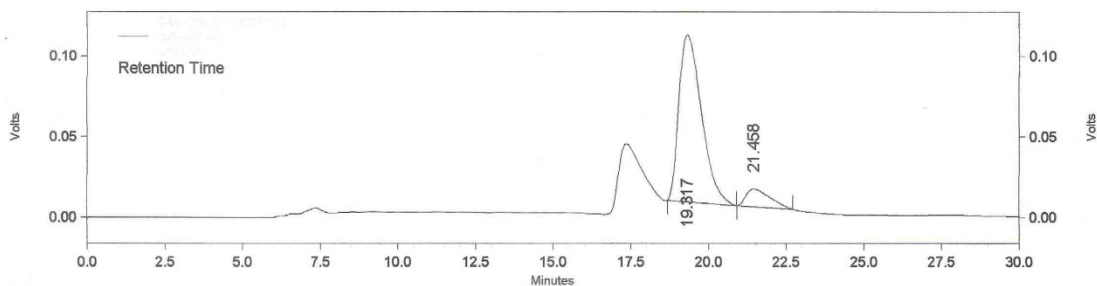

| Detector A - 1 (254nm) |                |         |         |
|------------------------|----------------|---------|---------|
| Pk #                   | Retention Time | Area    | Area %  |
| 1                      | 19.317         | 5264546 | 89.893  |
| 2                      | 21.458         | 591932  | 10.107  |
| Totals                 |                | 5856478 | 100.000 |

**3a (Racemic) (HPLC conditions mentioned above)**

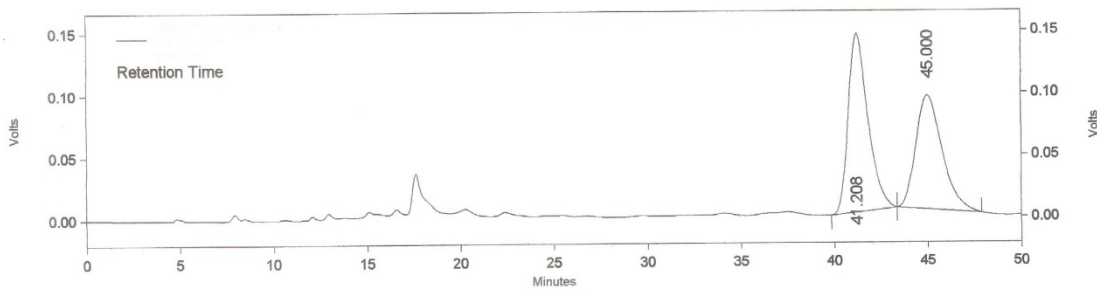

| Detector A - 1 (254nm) |                |          |         |
|------------------------|----------------|----------|---------|
| Pk #                   | Retention Time | Area     | Area %  |
| 1                      | 41.208         | 10492794 | 53.982  |
| 2                      | 45.000         | 8944643  | 46.018  |
| Totals                 |                | 19437437 | 100.000 |

**3a (Chiral) (Same HPLC conditions like racemic mentioned above)**

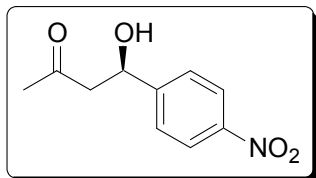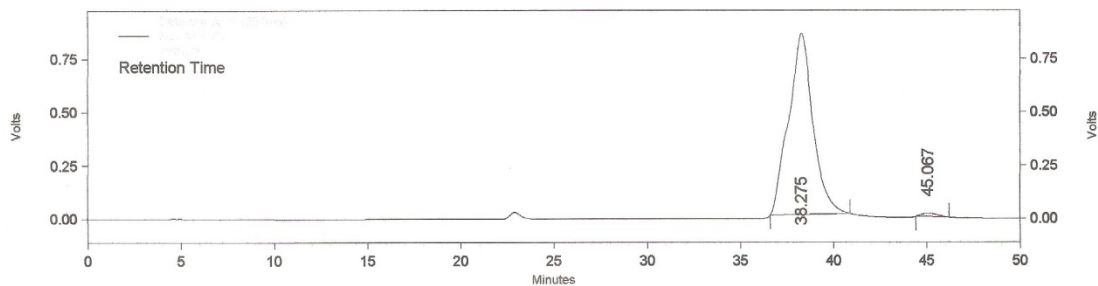

| Detector A - 1 (254nm) |                |          |         |
|------------------------|----------------|----------|---------|
| Pk #                   | Retention Time | Area     | Area %  |
| 1                      | 38.275         | 77098041 | 98.832  |
| 2                      | 45.067         | 911231   | 1.168   |
| Totals                 |                | 78009272 | 100.000 |

**3b (Racemic) (HPLC conditions mentioned above)**

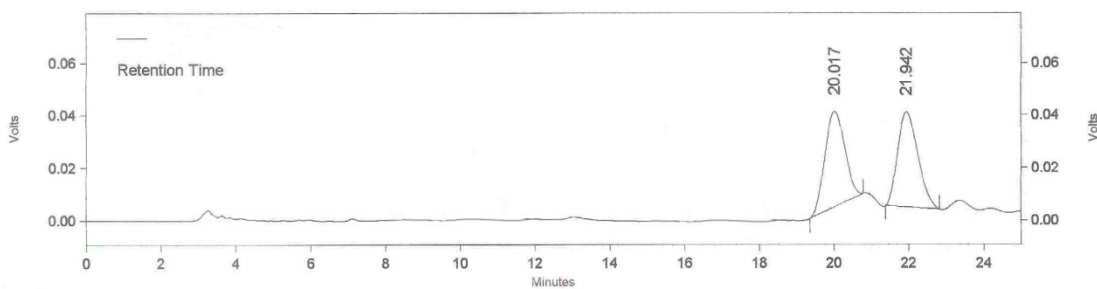

Detector A - 1 (265nm)

| Pk #   | Retention Time | Area    | Area %  |
|--------|----------------|---------|---------|
| 1      | 20.017         | 672927  | 49.626  |
| 2      | 21.942         | 683071  | 50.374  |
| Totals |                | 1355998 | 100.000 |

**3b (Chiral) (Same HPLC conditions like racemic mentioned above)**

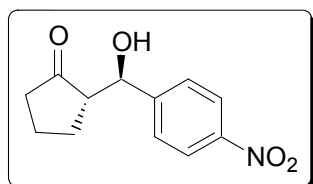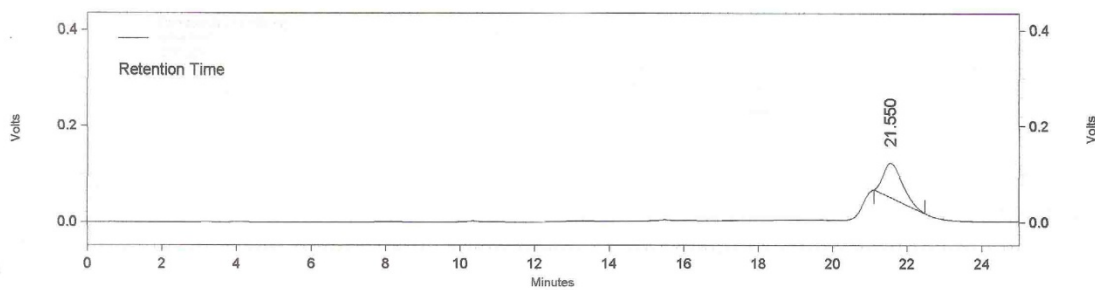

Detector A - 1 (265nm)

| Pk #   | Retention Time | Area    | Area %  |
|--------|----------------|---------|---------|
| 1      | 21.550         | 1273155 | 100.000 |
| Totals |                | 1273155 | 100.000 |

**Table 2**

Effect of the acid additives in the aldol reaction between 4-nitrobenzaldehyde and cyclohexanone catalyzed by **1**

Cyclohexanone (4 mmol) + 4-nitrobenzaldehyde (1 mmol)  $\xrightarrow[\text{Additive (5 mol\%), H}_2\text{O (0.01 ml), rt}]{\text{Catalyst 1 (10 mol\%)}}$  Product **2a**

| Entry | Additive (pK <sub>a</sub> )  | Time (h) | Yield <sup>a</sup> (%) | <i>anti/syn</i> <sup>b</sup> (%) | ee <sup>c</sup> (%) |
|-------|------------------------------|----------|------------------------|----------------------------------|---------------------|
| 1     | PTSA (-2.8)                  | 72       | 99                     | 93/7                             | 97                  |
| 2     | Methane sulfonic acid (-1.9) | 24       | 85                     | 81/19                            | 60                  |
| 3     | TFA (0.23)                   | 32       | 91                     | 84/16                            | 88                  |
| 4     | Picric acid (0.38)           | 84       | 97                     | 84/16                            | 97                  |
| 5     | L-Tartaric acid (2.89)       | 36       | 93                     | 80/20                            | 87                  |
| 6     | Citric acid (3.14)           | 24       | 87                     | 89/11                            | 73                  |
| 7     | 4-Nitrobenzoic acid (3.41)   | 24       | 95                     | 86/14                            | 93                  |
| 8     | 2,4-dinitrophenol (4.11)     | 17       | 96                     | 84/16                            | 93                  |
| 9     | Benzoic acid (4.2)           | 36       | 91                     | 82/18                            | 86                  |
| 10    | Adipic acid (4.43)           | 48       | 88                     | 82/18                            | 66                  |
| 11    | Oleic acid (9.85)            | 22       | 97                     | 80/20                            | 76                  |
| 12    | Stearic acid (10.15)         | 18       | 87                     | 78/22                            | 76                  |

<sup>a</sup> Isolated yield after purification by column chromatography. <sup>b</sup> Diastereomer ratios (*anti/syn*) were determined by <sup>1</sup>H NMR spectrum of the crude product mixture. <sup>c</sup> Determined by chiral HPLC analysis.
